# Supplementary material for: PEG/clay nanocomposite hydrogel: a mechanically robust tissue engineering scaffold
Source: Royal Society of Chemistry journal article supplement (doi:10.1039/c0sm00067a), 2010-01-01
Supplement: c0sm00067a.pdf [file c0sm00067a.pdf]

## Supplementary Information

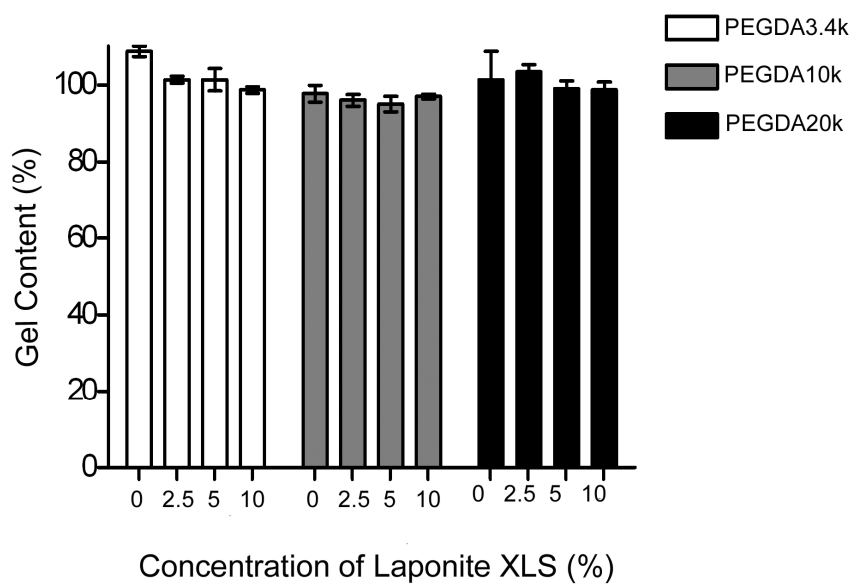

Fig. S1 Effect of Laponite XLS concentration on the gel content (dry weight/ initial weight of PEGDA and Laponite) of PEGDA NC hydrogels
